# Supplementary material for: Electrical aspects of the osmorespiratory compromise: TEP responses to hypoxia in the euryhaline killifish (Fundulus heteroclitus) in fresh water and sea water
Source: Oxford University Press journal article supplement (doi:10.1242/jeb.122176), 2015-01-01
Supplement: jeb122176supp.pdf [file jeb122176supp.pdf]

**Table S1.** Concentrations of Na<sup>+</sup> and Cl<sup>-</sup> in killifish plasma, freshwater and seawater, and associated activity coefficients used in simulations with the Nernst and Goldman-Hodgkin-Katz (GHK) equations

|                                                         | Plasma | Freshwater | Seawater |
|---------------------------------------------------------|--------|------------|----------|
| [Na <sup>+</sup> ] (mmol l <sup>-1</sup> ) <sup>1</sup> | 140    | 1.06       | 485      |
| Na <sup>+</sup> activity coefficient <sup>2</sup>       | 0.760  | 1.000      | 0.683    |
| [Cl <sup>-</sup> ] (mmol l <sup>-1</sup> ) <sup>1</sup> | 130    | 1.21       | 569      |
| [Cl <sup>-</sup> ] activity coefficient <sup>2</sup>    | 0.764  | 1.000      | 0.678    |

<sup>1</sup>Scott et al. (2006); Scott et al. (2008).

<sup>2</sup>Robinson and Stokes (1959); Potts and Hedges (1991).
